# Supplementary material for: Assessment of Regional Aerosol Radiative Effects under SWAAMI Campaign – Part 1: Quality-enhanced Estimation of Columnar Aerosol Extinction and Absorption Over the Indian Subcontinent
Source: Copernicus journal article supplement (doi:10.5194/acp-2019-153), 2019-02-21
Supplement: Supplementary file 1 [file acp-2019-153-supplement.pdf]

# Assessment of Regional Aerosol Radiative Effects under SWAAMI Campaign – PART 1: Quality-enhanced Estimation of Columnar Aerosol Extinction and Absorption Over the Indian Subcontinent

Harshavardhana Sunil Pathak<sup>1</sup>, Sreedharan Krishnakumari Satheesh<sup>1,2</sup>, Ravi Nanjundiah<sup>1,2,3</sup>, Krishnaswamy Krishna Moorthy<sup>1</sup>, Sivaramakrishnan Lakshmiarahan<sup>4</sup>, and Surendran Nair Suresh Babu<sup>5</sup>

<sup>1</sup>Centre for Atmospheric and Oceanic Sciences, Indian Institute of Science, Bangalore, India

<sup>2</sup>Divecha Centre for Climate Change, Indian Institute of Science, Bangalore, India

<sup>3</sup>Indian Institute of Tropical Meteorology, Pune 411008

<sup>4</sup>School of Computer Science, University of Oklahoma, Norman, United States of America

<sup>5</sup>Space Physics Laboratory, Vikram Sarabhai Space Centre, Thiruvananthapuram, India

**Correspondence:** Harshavardhana Sunil Pathak (rhsp19@gmail.com)

The details about the network of ground-based observatories (ARFINET and AERONET), the direct measurements from which are used in the present study, are provided in Table S1, S2 and S3 from Appendix S1. Appendix S2 has demonstrated the ability of Weighted Interpolation Method (WIM) to combine Satellite-Retrieved (SR) and GRound-based (GR) Aerosol Optical Depth (AOD) in such a way that uncertainty in the merged AOD is guaranteed to be smaller than those in satellite  
5 retrieved AOD . The details regarding the seasonal estimation of background error covariance matrix, which is required to combine ground-based Absorption AOD (AAOD) with OMI AAOD using 3D-VAR, are illustrated in Appendix 5.

## S1 ARFINET and AERONET observatories

The present study utilizes the monthly mean AOD data at 500 nm, measured at 27 ARFINET and 17 AERONET stations which are detailed in the Table S1 and S2, respectively. The list of 34 ARFINET observatories, the Black Carbon mass concentration  
10 measurements from which are employed in the present study, is provided in Table S3.

**Table S1.** ARFINET observatories, the AODs from which have been used in the present study.

| <b>Sr no.</b> | <b>Station name</b>                        | <b>Station ID</b> | <b>Latitude in degree north</b> | <b>Longitude in degree east</b> | <b>Altitude in m</b> | <b>Starting year</b> |
|---------------|--------------------------------------------|-------------------|---------------------------------|---------------------------------|----------------------|----------------------|
| 1             | Anantapur (rural, semiarid)                | ATP               | 14.46                           | 77.67                           | 0350                 | 2001                 |
| 2             | Bhubaneswar (semi-urban)                   | BBR               | 20.20                           | 85.80                           | 0078                 | 2009                 |
| 3             | Bangalore (urban)                          | BLR               | 12.97                           | 77.59                           | 0960                 | 2003                 |
| 4             | Chennai (urban)                            | CHN               | 12.70                           | 79.92                           | 0050                 | 2011                 |
| 5             | Dibrugarh (rural)                          | DBR               | 27.30                           | 94.60                           | 0111                 | 2002                 |
| 6             | Dehradun (semi-urban, Himalayan Foothills) | DDN               | 30.34                           | 78.04                           | 0700                 | 2007                 |
| 7             | Delhi (urban)                              | DEL               | 28.60                           | 77.20                           | 0239                 | 2012                 |
| 8             | Goa (semi-urban, coastal)                  | GOA               | 15.46                           | 73.83                           | 0070                 | 2007                 |
| 9             | Hyderabad (urban)                          | HYD               | 17.75                           | 78.73                           | 0557                 | 2003                 |
| 10            | Hyderabad (suburban)                       | HDT               | 17.47                           | 78.58                           | 0557                 | 2007                 |
| 11            | Hanle (rural, pristine, high altitude)     | HNL               | 32.78                           | 78.95                           | 4520                 | 2009                 |
| 12            | Imphal (rural)                             | IPH               | 24.75                           | 93.92                           | 0765                 | 2010                 |
| 13            | Jaisalmer (rural, desert)                  | JSL               | 26.92                           | 70.95                           | 0225                 | 2010                 |
| 14            | Jodhpur (suburban, arid)                   | JDR               | 26.26                           | 72.99                           | 0236                 | 1987 a               |
| 15            | Kashidhoo (rural,island)                   | KSD               | 4.96                            | 73.47                           | 1998-2000            |                      |
| 16            | Kullu (rural, high altitude)               | KLU               | 31.90                           | 77.10                           | 1154                 | 2009                 |
| 17            | Minicoy (island)                           | MCY               | 08.20                           | 73.00                           | 0002                 | 1995 a               |
| 18            | Mysore (semi-urban)                        | MYS               | 12.30                           | 76.50                           | 0772                 | 1989 a               |
| 19            | Nagpur (urban)                             | NGP               | 21.15                           | 79.15                           | 0300                 | 2008                 |
| 20            | Nainital (rural, Himalayan high altitudes) | NTL               | 29.20                           | 79.30                           | 1960                 | 2002                 |
| 21            | Port Blair (island)                        | PBR               | 11.64                           | 92.71                           | 0060                 | 2002                 |
| 22            | Patiala (semi-urban)                       | PTL               | 30.33                           | 76.46                           | 0249                 | 2006                 |
| 23            | Shillong (rural, high latitude)            | SHN               | 25.60                           | 91.91                           | 1033                 | 2008                 |
| 24            | Trivandrum (semi-urban, coastal)           | TVM               | 08.50                           | 77.00                           | 0002                 | 1986                 |
| 25            | Udaipur (semi-urban)                       | UDP               | 24.60                           | 73.90                           | 0577                 | 2010                 |
| 26            | Visakhapatnam (semi-urban, coastal)        | VSK               | 17.70                           | 83.10                           | 0020                 | 1988                 |
| 27            | Agartala (rural)                           | AGR               | 23.50                           | 91.25                           | 0043                 | 2010                 |

In Table S1, locations with population less than 0.5 million are considered as rural, locations having population in between 0.5 to 2 million are considered as semi-urban while locations with population exceeding 2 million are considered to be urban

(Babu et al., 2013). Most of the stations mentioned in Table S1 are operational even today except those marked as 'a' in front of respective starting year.

**Table S2.** AERONET observatories, the AOD from which have been used in the present study.

| <b>Sr no.</b> | <b>Station name</b>                              | <b>Station ID</b> | <b>Latitude in degree north</b> | <b>Longitude in degree east</b> | <b>Starting-end year</b> |
|---------------|--------------------------------------------------|-------------------|---------------------------------|---------------------------------|--------------------------|
| 1             | Baraily (urban)                                  | BRL               | 28.39                           | 79.43                           | 2008-2008                |
| 2             | Bhola (semiurban)                                | BHL               | 22.69                           | 90.65                           | 2013-2013                |
| 3             | Dhaka (Urban)                                    | DHK               | 23.73                           | 90.39                           | 2012-2014                |
| 4             | EVK2-CNR (rural, Himalayan high altitude)        | GCL               | 27.95                           | 86.81                           | 2006-2011                |
| 5             | Gandhi college (semi urban)                      | GCL               | 25.87                           | 84.12                           | 2006-2014                |
| 6             | Hanimadhoo (rural, island)                       | HNM               | 6.74                            | 73.17                           | 2004-2013                |
| 7             | Jaipur (arid, urban)                             | JPR               | 26.90                           | 75.80                           | 2009-2014                |
| 8             | Jomsom                                           | JSM               | 28.77                           | 83.71                           | 2011-2013                |
| 9             | Kanpur (urban)                                   | KNP               | 26.51                           | 80.23                           | 2001-2013                |
| 10            | Kashidhoo (rural, island)                        | KSD               | 4.96                            | 73.47                           | 1998-2000                |
| 11            | Karachi (urban, coastal)                         | KRC               | 24.87                           | 67.03                           | 2006-2013                |
| 12            | Lahore (urban)                                   | LHR               | 31.54                           | 74.32                           | 2006-2014                |
| 13            | Male (semiurban, island)                         | MLE               | 4.19                            | 73.53                           | 2001-2002                |
| 14            | Nainital (rural, Himalayan high altitudes)       | NTL               | 29.39                           | 79.45                           | 1998-2012                |
| 15            | Nam-Co (mountain lake, Himalayan high altitudes) | NMC               | 30.77                           | 90.00                           | 2006-2011                |
| 16            | Pantnagar (urban)                                | PNR               | 29.05                           | 79.52                           | 2008-2009                |
| 18            | Patiala (urban)                                  | PTL               | 30.32                           | 76.39                           | 2006-2012                |
| 19            | Pokhara (rural, Himalayan valley)                | PKR               | 28.15                           | 83.97                           | 2010-2013                |
| 20            | QQMS-CAM (semiurban, Himalayan high altitudes)   | QQM               | 28.36                           | 86.94                           | 2010-2014                |

**Table S3.** ARFINET observatories, the BC mass concentrations measurements from which have been used in the present study.

| Sr no. | Station name                               | Station ID | Latitude        | Longitude      | Altitude in m | Starting year |
|--------|--------------------------------------------|------------|-----------------|----------------|---------------|---------------|
|        |                                            |            | in degree north | in degree east |               |               |
| 1      | Agartala (rural)                           | AGR        | 23.50           | 91.25          | 0043          | 2010          |
| 2      | Ahmedabad (urban)                          | AMD        | 23.02           | 72.57          | 0053          | 2008          |
| 3      | Anantapur (rural, semiarid)                | ATP        | 14.46           | 77.67          | 0350          | 2001          |
| 4      | Bhubaneswar (semi-urban)                   | BBR        | 20.20           | 85.80          | 0078          | 2009          |
| 5      | Bangalore (urban)                          | BLR        | 12.97           | 77.59          | 0960          | 2003          |
| 6      | Chennai (urban)                            | CHN        | 12.70           | 79.92          | 0050          | 2011          |
| 7      | Dibrugarh (rural)                          | DBR        | 27.30           | 94.60          | 0111          | 2002          |
| 8      | Dehradun (semi-urban, Himalayan Foothills) | DDN        | 30.34           | 78.04          | 0700          | 2007          |
| 9      | Delhi (urban)                              | DEL        | 28.60           | 77.20          | 0239          | 2012          |
| 10     | Goa (semi-urban, coastal)                  | GOA        | 15.46           | 73.83          | 0070          | 2007          |
| 11     | Hyderabad (urban)                          | HYD        | 17.75           | 78.73          | 0557          | 2003          |
| 12     | Hyderabad (suburban)                       | HDT        | 17.47           | 78.58          | 0557          | 2007          |
| 13     | Hanle (rural, pristine, high altitude)     | HNL        | 32.78           | 78.95          | 4520          | 2009          |
| 14     | Imphal (rural)                             | IPH        | 24.75           | 93.92          | 0765          | 2010          |
| 15     | Jaisalmer (rural, desert)                  | JSL        | 26.92           | 70.95          | 0225          | 2010          |
| 16     | Kadappa (semi-urban)                       | KDP        | 14.46           | 78.81          | 0138          | 2011          |
| 17     | Kharagpur (rural)                          | KGP        | 22.50           | 87.50          | 0028          | 2004          |
| 18     | Kullu (rural, high altitude)               | KLU        | 31.90           | 77.10          | 1154          | 2009          |
| 19     | Minicoy (island)                           | MCY        | 08.20           | 73.00          | 0002          | 1995 a        |
| 20     | Mysore (semi-urban)                        | MYS        | 12.30           | 76.50          | 0772          | 1989 a        |
| 21     | Nagpur (urban)                             | NGP        | 21.15           | 79.15          | 0300          | 2008          |
| 22     | Nainital (rural, Himalayan high altitudes) | NTL        | 29.20           | 79.30          | 1960          | 2002          |
| 23     | Naliya (rural, coastal)                    | NAL        | 22.23           | 68.89          | 0050          | 2007          |
| 24     | Ooty (rural, high altitude)                | OTY        | 11.40           | 76.70          | 2520          | 2012          |
| 25     | Port Blair (island)                        | PBR        | 11.64           | 92.71          | 0060          | 2002          |
| 26     | Patiala (semi-urban)                       | PTL        | 30.33           | 76.46          | 0249          | 2006          |
| 27     | Pune (urban)                               | PUN        | 18.54           | 73.85          | 0457          | 2005          |
| 28     | Rajkot (urban)                             | RKT        | 22.3            | 70.8           | 0140          | 2008          |
| 29     | Ranchi (semi-urban)                        | RNC        | 23.23           | 85.23          | 0654          | 2010          |
| 30     | Shillong (rural, high latitude)            | SHN        | 25.60           | 91.91          | 1033          | 2008          |
| 31     | Trivandrum (semi-urban, coastal)           | TVM        | 08.50           | 77.00          | 0002          | 1986          |
| 32     | Udaipur (semi-urban)                       | UDP        | 24.60           | 73.90          | 0577          | 2010          |
| 33     | Varanasi (semi-urban)                      | VNS        | 25.3            | 82.96          | 0078          | 2009          |
| 34     | Visakhapatnam (semi-urban, coastal)        | VSK        | 17.70           | 83.10          | 0020          | 1988          |

## S2 Uncertainty in merged AOD

Satellite retrieved (SR) AODs have uncertainties than those in ground-based (GR) AOD measurements, due to several reasons. As merged AOD product is developed by systematically combining SR and GR AOD by weighted interpolation method (WIM), it would be interesting to analyze and compare uncertainty in merged AOD (MG AOD) w.r.t. that in its parent datasets.

- 5 For simplicity, we assume a case in which SR AOD at a given grid point ( $X_1$ ) is being merged with a GR AOD ( $X_2$ ) from a ground-based aerosol observatory lying within the horizontal radius of influence from the grid point. According to WIM, MG AOD is expressed as a convex combination of its parents as following.

$$\tilde{X} = AX_1 + BX_2 \quad (1)$$

- Here,  $\tilde{X}$  is MG AOD at the given grid point and  $A$  and  $B$  are weights (real, positive valued scalars) for corresponding SR and GR AOD respectively. As WIM expresses MG AOD as a convex combination of SR and GR AOD, we can write

$$A + B = 1 \quad (2)$$

which means

$$A^2 + B^2 = 1 - 2AB \quad (3)$$

Taking variance on both sides of equation 1 we can write,

$$15 \text{ var}(\tilde{X}) = A^2 \text{ var}(X_1) + B^2 \text{ var}(X_2); \quad (4)$$

Equation 4 is expressing variance in MG AOD as a linear combination of variance in SR and GR AOD with  $A^2$  and  $B^2$  being respective weights. As the sum of  $A^2$  and  $B^2$  can never be greater than unity, as can be seen from equation 3, following inferences can be drawn regarding variance in MG AOD.

1. Variance of MG AOD can never be greater than variance of both of its parents.
- 20 2. Variance of MG AOD can be smaller than that of both of its parents or can at least be smaller than variance of SR AOD.

These observations can be verified for the general case in which observations from multiple ground stations are being merged with the background data at a give grid point (i.e.  $X_2$  is a vector).

## S3 3D-VAR : Construction of observational and background covariance matrices

- 3D-VAR, one of the widely used data assimilation methods based on least square optimization, expresses the assimilated field
- 25 in terms of parent datasets and their covariance matrices, as shown in the following equation (Kalnay, 2003; Lewis et al., 2006)

$$[B^{-1} + H^T R^{-1} H] X = [B^{-1} X_b + H^T R^{-1} Z] \quad (5)$$

Here,  $X$  and  $X_b$  refer to MG AAOD and OMI AAOD vectors, respectively, of size  $n \times 1$ , where 'n' is the total no of grid points in the spatial domain ( $n=1120$  for the current study). Further from equation 5,  $Z$  denotes the vector of GR AAODs, which is of size  $m \times 1$  where  $m$  is the no. of ground-based observatories data from which is used for merging. The map from the grid space and the observation space is provided by the interpolation matrix referred as  $H$  (size  $m \times n$ ) in equation 5. Here,  $H$  is constructed through bilinear interpolation of gridded background data to the locations of ground-based observatories encompassed by those grid points. Finally,  $B$  (size  $n \times n$ ) and  $O$  (size  $m \times m$ ) represent the error covariance matrices for OMI AAODs and GR AAODs respectively.

For the successful implementation of 3D-VAR, appropriate construction of  $B$  and  $R$  is quite important as these covariance matrices not only decide the spatial patterns in which observations are assimilated with the gridded background data but also provides the weights given to the respective parent datasets during the assimilation. The construction of observation error covariance matrix ( $R$ ) is already detailed in the main article (section 3.2), however the details regarding estimation of background error covariance matrix ( $B$ ) are as given below.

### S3.1 Constructing background error covariance matrix (B)

In the present work, as the observation error covariance matrix has the diagonal structure, the task of deciding the spatial patterns in which GR AAODs blend with the gridded background data, is performed by the background error covariance matrix only. So, the construction of matrix B is a crucial for the present merged product to be realistic. As such, we have made use of time series of OMI AAOD data (500 nm, monthly mean) from 2005 to 2016, for constructing B.

As a first step to estimate B, the data matrix ( $D$ ) with it's columns formed by  $X_b$  at different time instances (say  $k =$  no. of time instances) is constructed and thus matrix  $D$  has the size of  $n \times k$ . The climatology of AAOD at each grid point is constructed by taking mean of each row of the data matrix to get the column vector of size  $n \times 1$  which we refer as  $C$ . The anomaly matrix (referred as  $A$ , size  $n \times k$ ) is then constructed as shown in equation 6

$$A(i, j) = D(i, j) - C(i, 1) \quad (6)$$

In equation 6, the index  $i$  refers to spatial location and  $j$  refers to the time instance. The background error covariance matrix, B is then estimated as shown in equation 7.

$$B = \frac{I}{k-1} A A^T \quad (7)$$

In the above equation 7,  $I$  refers to an identity matrix of size  $n \times n$ .

In the view of the statistically estimated matrix B to be realistic, one would opt to employ the longest possible time series of OMI AAOD, which translates to making use of OMI AAODs for all the months during year 2005 to 2016 to construct B. However in that case, the temporal variations (especially at seasonal scale) in OMI AAOD, can lead to bias in the estimated covariance. It is to be noted here that the seasonal variations in AAOD can primarily be associated with seasonal changes in the sources and loading of absorbing aerosol species as well as the meteorological parameters (boundary layer height, large scale wind patterns) over the Indian region.

In order to avoid this potential bias in the estimate of matrix  $B$ , we have estimated the background error covariance matrix separately for pre-monsoon season, Mar-Apr-May (MAM) (deeper PBLH causing enhanced vertical mixing of aerosols) and for post-monsoon + winter (Oct to Feb, ONDJF) (shallower PBL and relatively lesser vertical mixing of aerosols). Henceforth, we refer background covariance matrices for pre-monsoon and post monsoon + winter season as  $B_{PM}$  and  $B_{WT}$  respectively.

5 It is to be noted that, the existence of long-term trend in OMI AAOD is also examined and de-trending is performed if a trend is found significant at 95% confidence level. These de-trended AAODs are then employed for the estimation of  $B_{PM}$  and  $B_{WT}$ , in order to avoid the bias emanating from probable long-term trend in OMI AAODs. However, due to quite limited length of background data available (36 months for MAM and 60 months for ONDJF during year 2005 to 2016),  $B_{PM}$  and  $B_{WT}$  are rank-deficient and hence singular. So, in order to make them full rank matrices, we have added a small value ( $\sim 10^{-8}$ ) to the  
10 diagonal elements of  $B_{PM}$  and  $B_{WT}$ , which is known as the method of regularization (Lewis et al., 2006). This addition to the diagonal elements of  $B_{PM}$  and  $B_{WT}$  is neither altering the structure of covariance matrices nor making significant changes to variances (i.e. diagonal elements) which are of the order of  $10^{-6}$ , for the present study. The regularized  $B_{PM}$  and  $B_{WT}$  are then employed to respectively estimate the merged AAODs (using equation 5) for the months March to May and October to February.

## References

- Babu, S. S., Manoj, M., Moorthy, K. K., Gogoi, M. M., Nair, V. S., Kompalli, S. K., Satheesh, S., Niranjana, K., Ramagopal, K., Bhuyan, P., et al.: Trends in aerosol optical depth over Indian region: Potential causes and impact indicators, *Journal of Geophysical Research: Atmospheres*, 118, 2013.
- 5 Kalnay, E.: *Atmospheric modeling, data assimilation and predictability*, Cambridge university press, 2003.
- Lewis, J. M., Lakshminarayanan, S., and Dhall, S.: *Dynamic data assimilation: a least squares approach*, vol. 104, *Encyclopedia of Mathematics and its Applications*, Cambridge University Press, 2006.
